# Supplementary material for: miR-143-3p inhibits endometriotic stromal cell proliferation and invasion by inactivating autophagy in endometriosis
Source: PubMed Central journal article supplement — Mol Med Rep. 2021 Mar 12;23(5):356. doi: 10.3892/mmr.2021.11995 (PMC7974257; doi:10.3892/mmr.2021.11995), 2021-03-12
Supplement: Supplementary_Data.pdf [file Supplementary_Data.pdf]

Table SI. List of the 57 peptides without precursor proteins.

---

Peptide sequences

---

LGSAEAAGPGAGAEGSWPPPSGAPD  
GSGGGSGGRYGS  
DGEAGAQQPPGP  
EKGDQGAQQPPGP  
GKDGEAGAQQPPGP  
NLGPASGHGTPASS  
GPPPRS GGPPP  
DRVYIHP  
DKIEDVPAPSTS  
SPGERGETGPPGP  
DGLPGDMGPPGTP  
RETGETSPAQVNKAEHSSSSP  
EDAAEIRLVSKDG  
KSPENTEGKDGSKVTK  
DALQELR  
DGIPGAQGIM  
GRAEAASWGDRGNDKGGLGNPD  
HAAGAPPPPPPGH  
KSKGASTP  
MADPEELQVSSPPPPPP  
ERANEAGGQVGPEAP  
NGKQREFESR  
NGPLGPSEASIASNLQAMSTQM  
AAPAAGSAPAAAEEKKDE  
HTKKDYEEIGP  
DEREDITHTY  
DNNVLVMDLLGP  
GMGWGPPPPPPP  
PGMGWGPPPPPPP  
SHDRDSPPPPPPPP  
NSFRSLTWPPSGSPSHAGT  
ENGASVILR  
ENTEDWRP  
PMGPGMNP GPP  
PMGPGPNMGPP  
QSENSVPPPPPPP  
METEQPEETFPNT  
AEFSGEC SNLADRG  
GKNGPMGPPGMPGVP  
MEVKPPP  
METEQPEETFPNT  
RCRKRNP PPP  
GLPPQQPPPPPP  
PAPVPQQPPPPPP  
PFPTVATTPPPP  
PGLPPQQPPPPPP  
PPGPPQQLPPPP  
PSVIHSPPPPPPP  
STSLRQAAPPPP  
SVIHSPPPPPPP  
EGPGAEGPR  
EEAPSLRP  
HQAAPPPPPPPPPP  
PHQAAPPPPPPPPPP  
SNEVETSATNGQPQQ  
EDEGPAEPPPPP  
VEQIAAIAQELNELDYD SHNVNTR

---

Table SII. Sequence information of the six peptides.

| Peptide sequences           | UniProt accession | Protein name | P-value                  |
|-----------------------------|-------------------|--------------|--------------------------|
| SESSSKSSQPLA                | P17096            | HMGA1        | $5.74526 \times 10^{-5}$ |
| EPEDEEEEEEEEEDEDEDLEELEVLER | Q9NQC3            | RTN4         | $1.78342 \times 10^{-4}$ |
| SLMPLPDGNGLEDGNVRH          | Q9ULZ1            | APEL         | $1.74441 \times 10^{-3}$ |
| KPTTEEKKPAA                 | P36578            | RL4          | $2.99364 \times 10^{-3}$ |
| LLQDSVDFSLADAINTEFK         | P08670            | VIME         | $3.68230 \times 10^{-3}$ |
| DDVVGETVGKTD                | P27816            | MAP4         | $7.81321 \times 10^{-3}$ |

HMGA1, High mobility group protein HMG-I/HMG-Y; RTN4, Reticulon-4; APEL, Apelin; RL4, 60S ribosomal protein L4; VIME, Vimentin; MAP4, Microtubule-associated protein 4.
